# Supplementary material for: Pivotal role of CD103 in the development of psoriasiform dermatitis
Source: PubMed Central journal article supplement (PMC7239860; doi:10.1038/s41598-020-65355-9), 2020-05-20
Supplement: 41598_2020_65355_MOESM1_ESM.pdf [file 41598_2020_65355_MOESM1_ESM.pdf]

## Supplementary Information

### Pivotal role of CD103 in the development of psoriasiform dermatitis

Takehito Fukui<sup>1,2</sup>, Tomohiro Fukaya<sup>1,7</sup>, Tomofumi Uto<sup>1,7</sup>, Hideaki Takagi<sup>1,7</sup>, Junta Nasu<sup>1,2</sup>, Noriaki Miyanaga<sup>1,3</sup>, Yotaro Nishikawa<sup>1,4</sup>, Haruhiko Koseki<sup>5</sup>, Narantsog Choijookhuu<sup>6</sup>, Yoshitaka Hishikawa<sup>6</sup>, Yoshihiro Yamashita<sup>2</sup> & Katsuaki Sato<sup>1,7</sup>

<sup>1</sup>Division of Immunology, Department of Infectious Diseases, Faculty of Medicine, University of Miyazaki, 5200 Kihara, Kiyotake, Miyazaki 889-1692, Japan

<sup>2</sup>Department of Oral and Maxillofacial Surgery, Faculty of Medicine, University of Miyazaki, 5200 Kihara, Kiyotake, Miyazaki 889-1692, Japan

<sup>3</sup>Department of Otolaryngology, Head and Neck Surgery, Faculty of Medicine, University of Miyazaki, 5200 Kihara, Kiyotake, Miyazaki 889-1692, Japan

<sup>4</sup>Department of Dermatology, Faculty of Medicine, University of Miyazaki, 5200 Kihara, Kiyotake, Miyazaki 889-1692, Japan

<sup>5</sup>Laboratory for Developmental Genetics, RIKEN Center for Integrative Medical Sciences, 1-7-22 Suehiro-cho, Tsurumi-ku, Yokohama, Kanagawa 230-0045, Japan

<sup>6</sup>Division of Histochemistry and Cell Biology, Department of Anatomy, Faculty of Medicine, University of Miyazaki, Miyazaki 889-1692, Japan

<sup>7</sup>Japan Agency for Medical Research and Development (AMED), 1-7-1 Otemachi, Chiyoda-ku, Tokyo 100-0004, Japan

**Correspondence should be addressed to:** Katsuaki Sato, Division of Immunology, Department of Infectious Diseases, Faculty of Medicine, University of Miyazaki, 5200 Kihara, Kiyotake, Miyazaki 889-1692, Japan

Phone: +81-985-85-9815, Fax: +81-985-85-9899,

e-mail: [katsuaki\\_sato@med.miyazaki-u.ac.jp](mailto:katsuaki_sato@med.miyazaki-u.ac.jp)

**Supplementary Table 1**

RT-PCR primer Sequence

---

|               |                                                                    |
|---------------|--------------------------------------------------------------------|
| <i>Gapdh</i>  | F-5'-AAATTC AACGGCACAGTCAAG-3'<br>R-5'-TGGTGGTGAAGACACCAGTAG-3'    |
| <i>Il1a</i>   | F-5'-TCCAGGGCAGAGAGGGAGT-3'<br>R-5'-GGAAC TTTGGCCATCTTGATTT-3'     |
| <i>Il1b</i>   | F-5'-GAAGAAGAGCCCATCCTCTG-3'<br>R-5'-TCATCTCGGAGCCTGTAGTG-3'       |
| <i>Il6</i>    | F-5'-GACTGATGCTGGTGACAACC-3'<br>R-5'-CCTCCGACTTGTGAAGTGG-3'        |
| <i>Il10</i>   | F-5'-TGCAGCAGCTCAGAGGGT-3'<br>R-5'-TGGCCACAGTTTTTCAGGGAT-3'        |
| <i>Il12a</i>  | F-5'-AAACCAGACCCGCCCAAGAAC-3'<br>R-5'-AAAAAGCCAACCAAGCAGAAGACAG-3' |
| <i>Il17a</i>  | F-5'-CTGCTGAGCCTGGCGGCTAC-3'<br>R-5'-CATTGCGGTGGAGAGTCCAGGG-3'     |
| <i>Il19</i>   | F-5'-GCCAACTCTTTCCTCTGCGT-3'<br>R-5'-GGTGGCTTCCTGACTGCAGT-3'       |
| <i>Il20</i>   | F-5'-GACCCCTGACCACCATACCC-3'<br>R-5'-CCATTGCTTCTTCCCCACAA-3'       |
| <i>Il22</i>   | F-5'-CAGCTCCTGTCACATCAGCGGT-3'<br>R-5'-AGGTCCAGTTCCCAATCGCCT-3'    |
| <i>Il23a</i>  | F-5'-TCCGTTCCAAGATCCTTCG-3'<br>R-5'-GAACCTGGGCATCCTTAAGC-3'        |
| <i>Tnf</i>    | F-5'-GCCACGTCGTAGCAAACCAC-3'<br>R-5'-GCAGGGGCTCTTGACGGCAG-3'       |
| <i>Cxcl1</i>  | F-5'-GCCTATCGCCAATGAGCTG-3'<br>R-5'-ATTCTTGAGTGTGGCTATGA-3'        |
| <i>Cxcl2</i>  | F-5'-ATGCCTGAAGACCCTGCCAAG-3'<br>R-5'-GGTCAGTTAGCCTTGCCTTTG-3'     |
| <i>S100a7</i> | F-5'-GGGCAGCTGACAAAAACAAG-3'<br>R-5'-TGGAAC TGGAGATGGTAGTCC-3'     |
| <i>S100a8</i> | F-5'-CCATGCCCTCTACAAGAATG-3'<br>R-5'-ATCACCATCGCAAGGA ACTC-3'      |

---

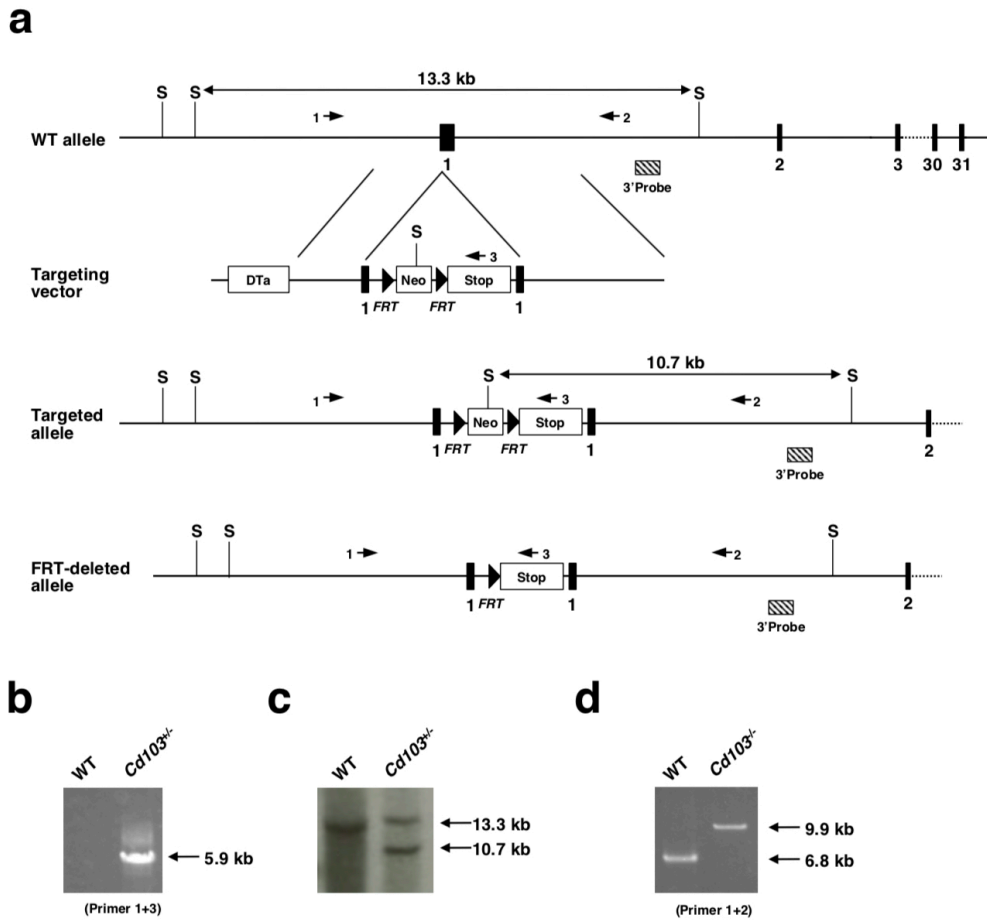

**Supplementary Figure 1.** Generation and identification of *Cd103*<sup>-/-</sup> mice. **(a)** Strategy used to produce the *Cd103*<sup>-/-</sup> mice. (1) Partial restriction map of the WT *Cd103* gene. Exons are depicted as black boxes. The restriction site indicated is S: *SpeI* (2) Targeting vector used to introduce the mutations in the *Cd103* gene. A *SalI* site engineered in place of the start codon in exon 1 of the *Cd103* gene was used to clone the *FRT-PGK-gb2-Neo-FRT-Stop* cassette. DTa: diphtheria toxin a expression cassette, Stop: Stop cassette, Neo: Neo cassette. The Neo cassette is shown bracketed by FRT sites (filled triangles). (3) Structure of the targeted allele following homologous ESC clones. (4) Structure of the *Cd103* allele following expression of FLP recombinase and excision of the Neocassette in mutant mice. The 3' external single-copy probe (a hatched box) and the PCR primers at the 5' end (blackarrows) used to verify proper homologous recombination events are shown. **(b,c)** DNA-PCR **(b)** and Southern blot **(c)** analysis of WT and recombinant ESC clones. **(d)** Genotyping of tail DNA from WT mice and homozygous mice for the *Cd103* allele by DNA-PCR. The results are representative of at least three independent experiments.

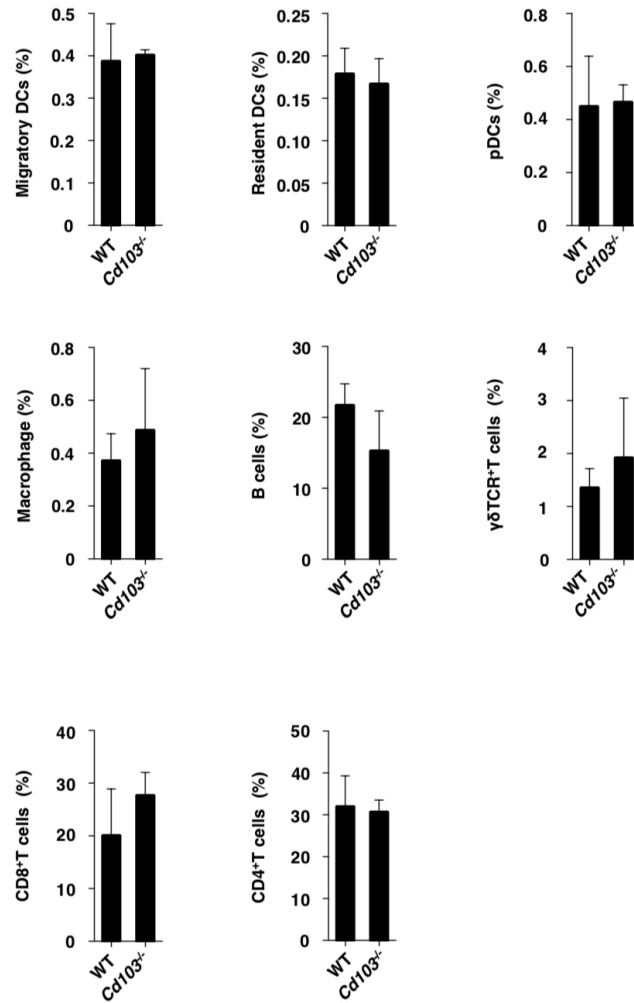

**Supplementary Figure 2.** Constituencies of leukocytes in PLNs in *Cd103*<sup>-/-</sup> mice. The frequency of the indicated leukocytes in skin-draining PLNs was analyzed by flow cytometry in WT mice (n=3) and *Cd103*<sup>-/-</sup> mice (n=3). Data are the mean  $\pm$  s.d. from three individual samples in a single experiment. The results are representative of at least three independent experiments.

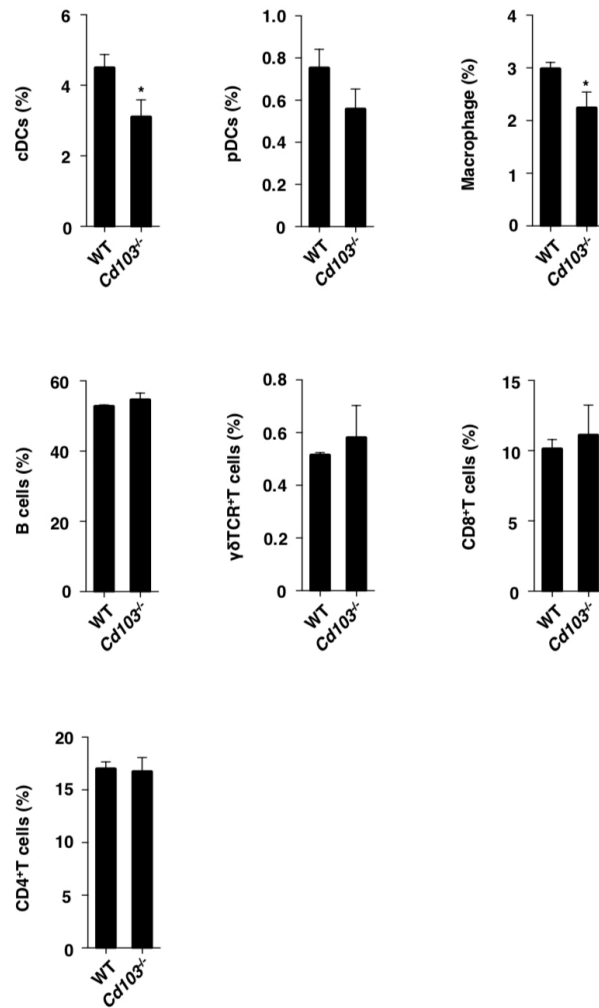

**Supplementary Figure 3.** Constituencies of splenic leukocytes in *Cd103<sup>-/-</sup>* mice. The frequency of the indicated leukocytes in Spl was analyzed by flow cytometry in WT mice (n=3) and *Cd103<sup>-/-</sup>* mice (n=3). Data are the mean  $\pm$  s.d. from three individual samples in a single experiment. \* $P < .05$  compared with WT mice. The results are representative of at least three independent experiments.

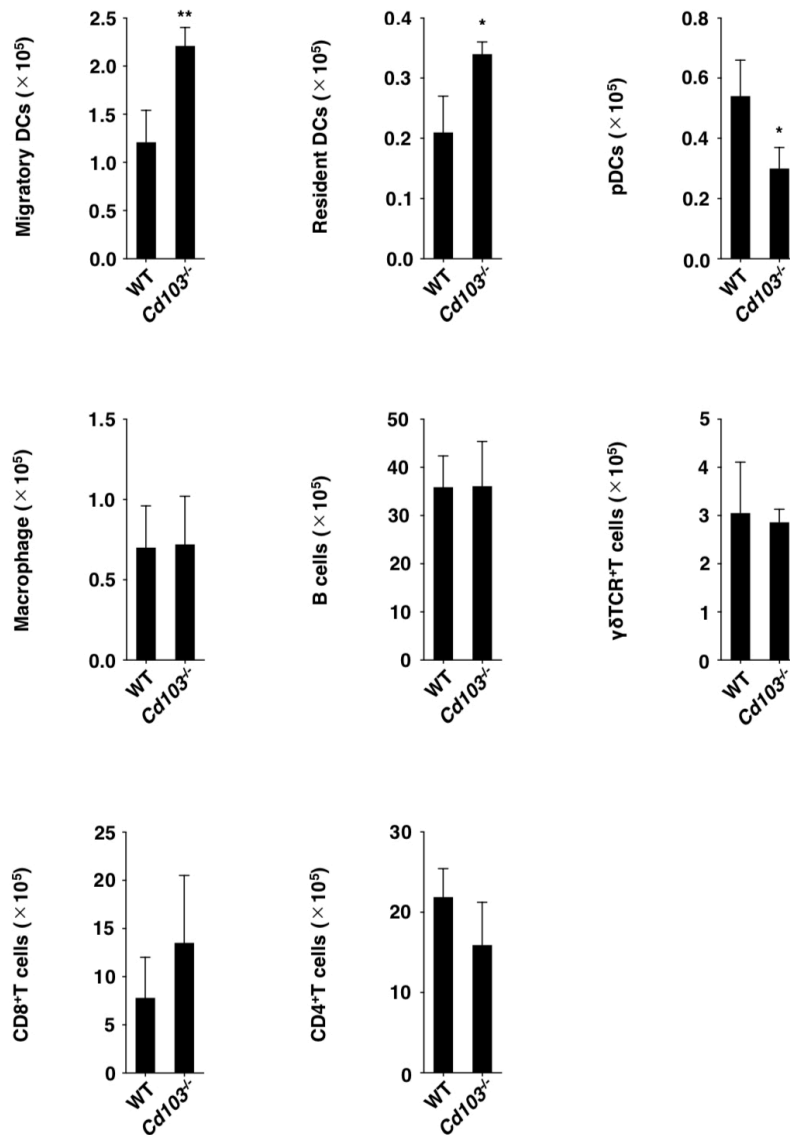

**Supplementary Figure 4.** Absence of CD103 enhances the accumulation of inflammatory leukocytes in skin-draining PLNs. The absolute cell numbers of leukocytes in the skin-draining PLNs at day 6 after topical application of IMQ on the left ear skin every day for 6 days in WT mice (n=5) and *Cd103*<sup>-/-</sup> mice (n=5). Data are the mean ± s.d. in three to four individual samples in a single experiment. \**P* < .05, \*\**P* < .01 compared with WT mice. The results are representative of at least three independent experiments.

**a**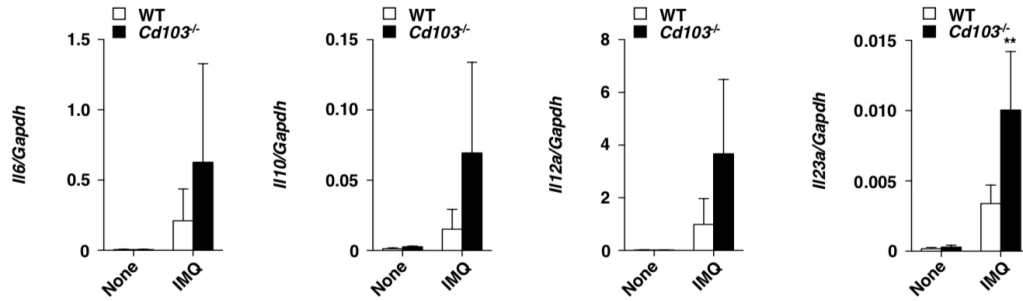**b**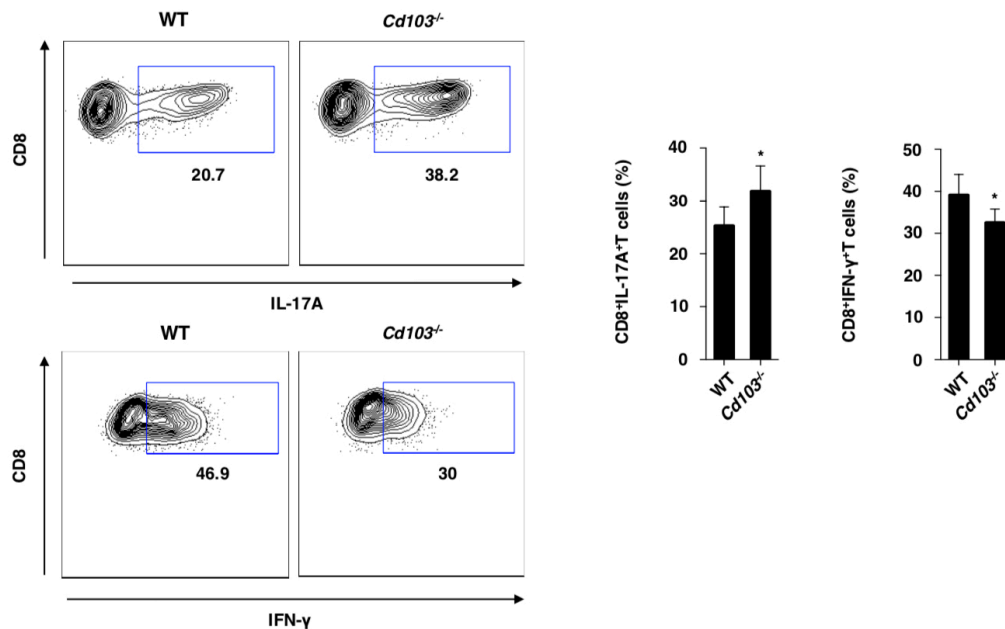

**Supplementary Figure 5.** CD103 deficiency enhances the TLR7-mediated activation of cDCs. **(a)** Splenic cDCs derived from WT mice and *Cd103*<sup>-/-</sup> mice were not stimulated (None) or stimulated with IMQ (IMQ). The transcriptional expressions of cytokines in cDCs. Data are the mean  $\pm$  s.d. from three to six individual samples in a single experiment. \*\* $P < .01$  compared with WT mice. **(b)** CD8<sup>+</sup> T cells were cultured with cDCs obtained from the skin-draining PLNs in WT mice and *Cd103*<sup>-/-</sup> mice for 5 days under T<sub>c</sub>17-polarized culture conditions. The frequency of IL-17A- and IFN- $\gamma$ -producing cells among CD8<sup>+</sup> T cells. Data are presented as a contour plot, and numbers mean the proportion of the indicated cell populations in each gate (left panel). Data are the mean  $\pm$  s.d. in three individual samples in a single experiment (right panel). \* $P < .05$  compared with WT mice. The results are representative of at least three independent experiments.

**a**

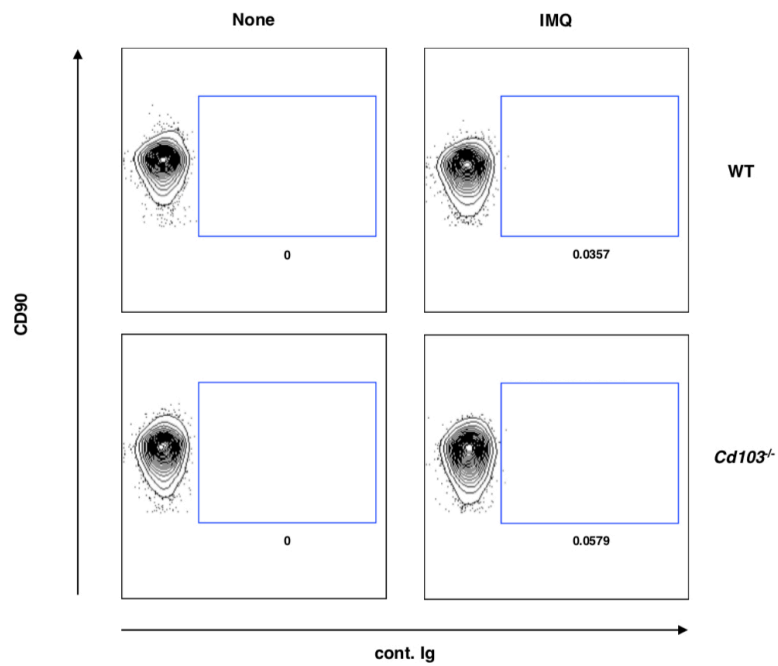

**b**

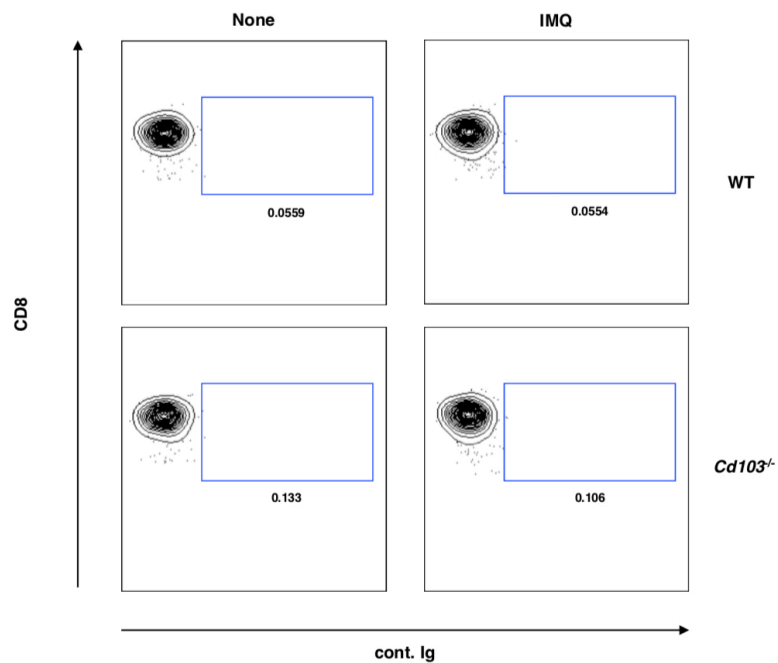

**Supplementary Figure 6.** Staining of IL-17A-producing lymphocytes with isotype control mAb. WT mice (n=3) and *Cd103*<sup>-/-</sup> mice (n=3) were treated topically with IMQ on the left ear skin every day for 6 days. Data are presented as a contour plot for isotype control staining (cont. Ig) of innate lymphocytes (a) and CD8<sup>+</sup> T cells (b) in the skin-



draining PLNs. The results are representative of at least three independent experiments.

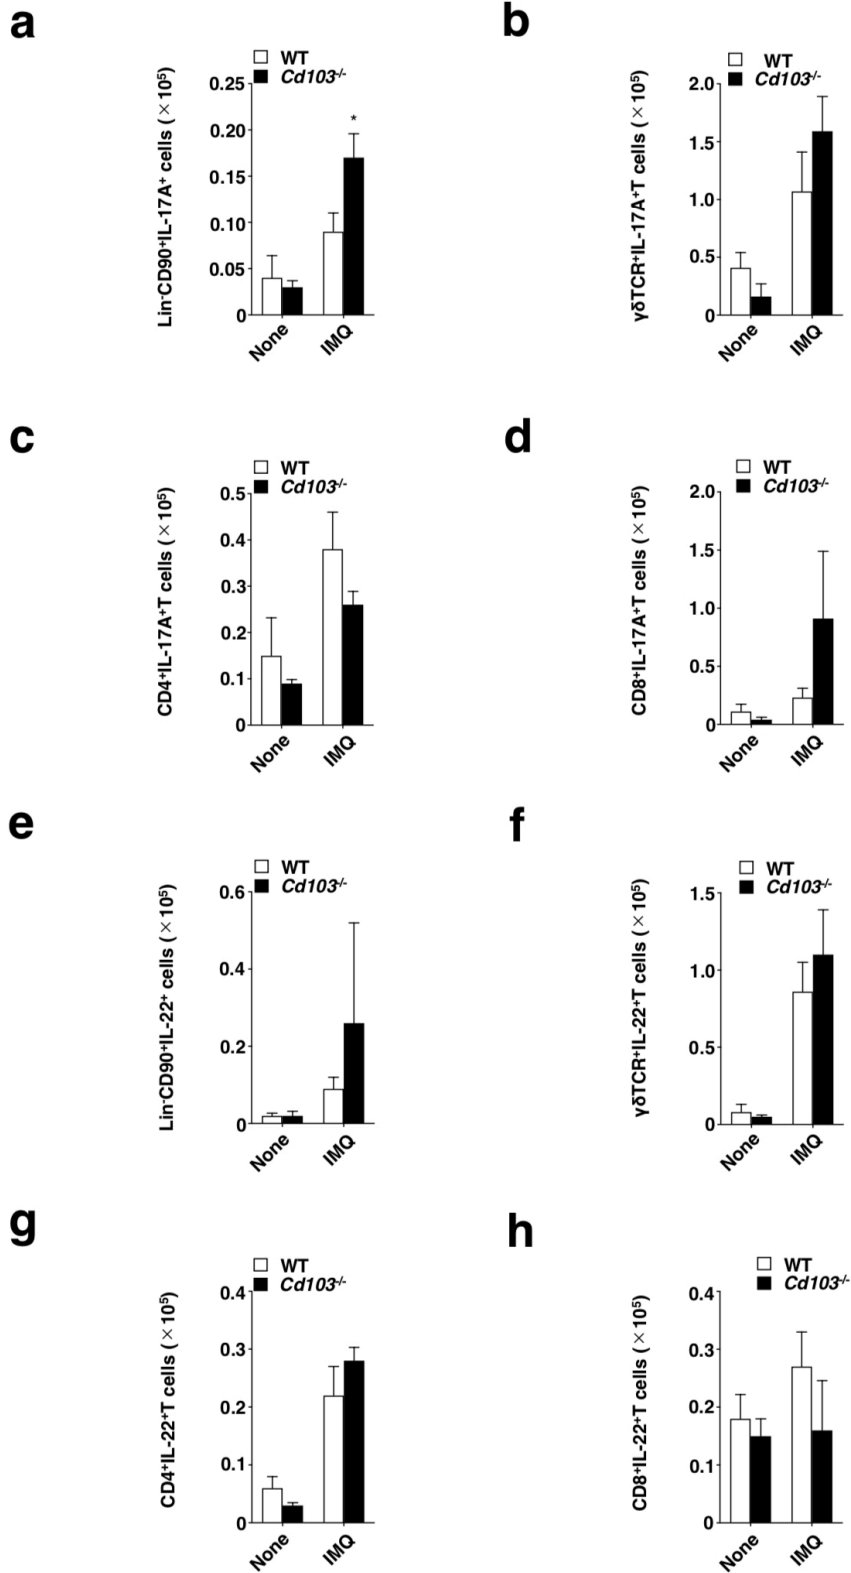

**Supplementary Figure 7.** CD103 deficiency enhances the generation of IL-17A-producing lymphocytes in the skin-draining PLNs in the progression of psoriasiform skin

inflammation. WT mice (n=3) and *Cd103*<sup>-/-</sup> mice (n=3) were treated topically with IMQ on the left ear skin every day for 6 days. The absolute cell numbers of IL-17A-producing cells (**a-d**) and IL-22-producing cells (**e-h**) among innate lymphocytes (**a,e**),  $\gamma\delta$ TCR<sup>+</sup> T cells (**b,f**), CD4<sup>+</sup> T cells (**c,g**), and CD8<sup>+</sup> T cells (**d,h**) in the skin-draining PLNs at days 0 and 6. Data are the mean  $\pm$  s.d. in three individual samples in a single experiment. \**P* < .05, \*\**P* < .01 compared with WT mice. The results are representative of at least three independent experiments.

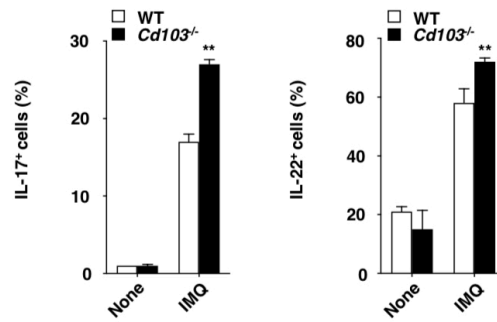

**Supplementary Figure 8.** CD103 deficiency promotes the generation of IL-17A-producing lymphocytes in the dermal tissues in the development of psoriasiform skin inflammation. WT mice (n=3) and *Cd103*<sup>-/-</sup> mice (n=3) were treated topically with IMQ on the left ear skin every day for 6 days. The frequencies of IL-17A-producing cells and IL-22-producing cells CD45.2<sup>+</sup> leukocytes in the dermal tissues at days 0 and 6. Data are the mean  $\pm$  s.d. in three individual samples in a single experiment. \* $P < .05$ , \*\* $P < .01$  compared with WT mice. The results are representative of at least three independent experiments.

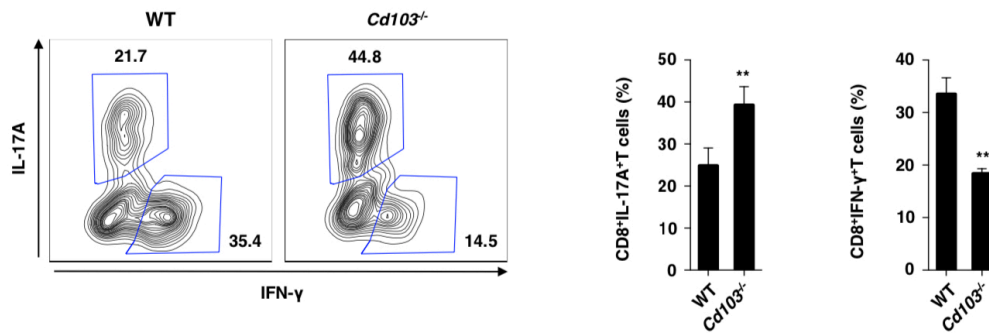

**Supplementary Figure 9.** Influence of CD103 deficiency on the generation of T<sub>c</sub>17 cells. CD8<sup>+</sup> T cells derived from WT mice and *Cd103*<sup>-/-</sup> mice were cultured for 5 days under T<sub>c</sub>17-polarized culture conditions. The frequency of IL-17A- and IFN- $\gamma$ -producing cells among CD8<sup>+</sup> T cells. Data are presented as a contour plot, and numbers mean the proportion of the indicated cell populations in each gate (left panel). Data are the mean  $\pm$  s.d. in three to five individual samples in a single experiment (right panel). \*\* $P < .01$  compared with WT mice. The results are representative of at least three independent experiments.

**Figure S1b**

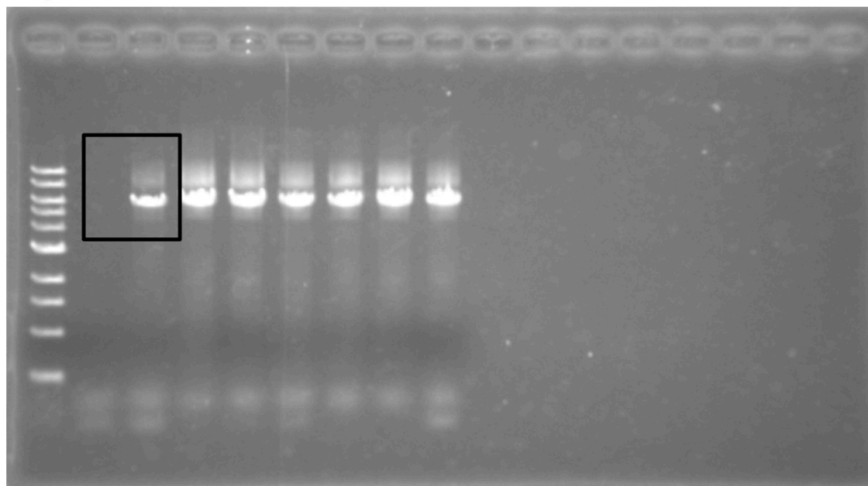

**Figure S1c**

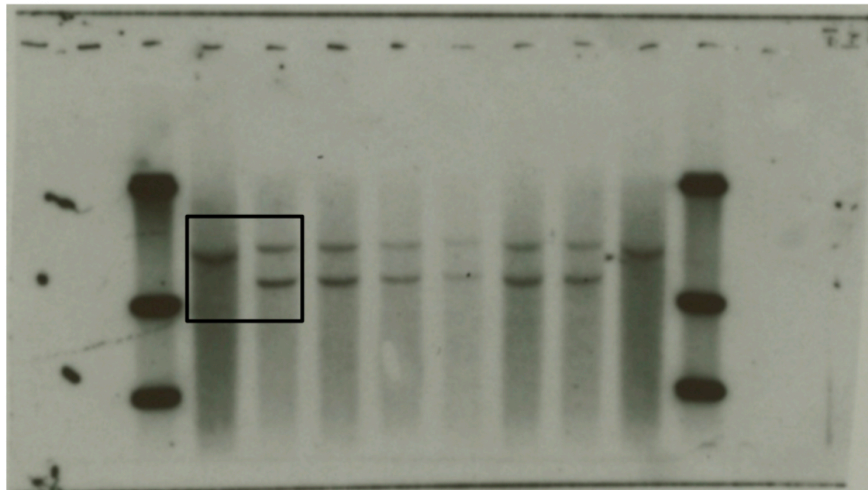

**Figure S1d**

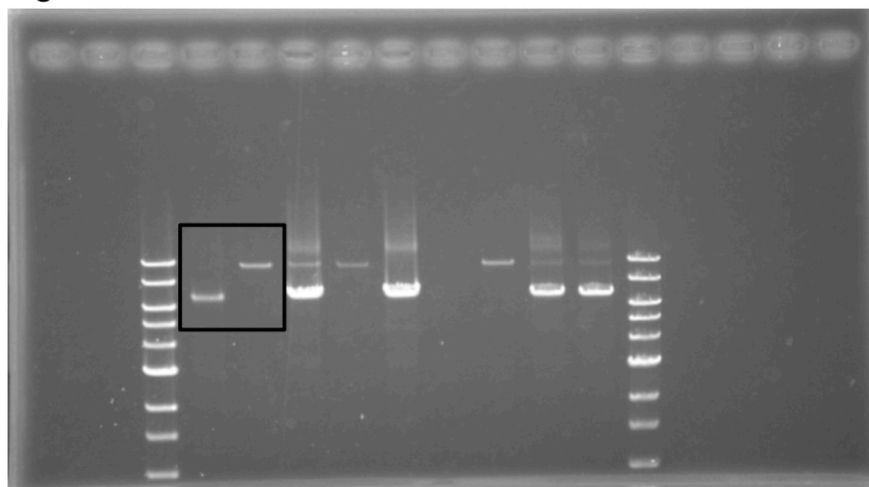

**Supplementary Figure 10.** Full-length gels and blots of Supplementary Figure 1b-d.
